# Supplementary material
Source: Copernicus journal article supplement (doi:10.5194/egusphere-2026-1629)
Supplement: Supplementary file [file egusphere-2026-1629-RC1-supplement.pdf]

Review of “Effects of model resolution on predicting atmospheric ducting conditions with Harmonie-AROME” by K. Hamalainen, L. Rautiainen, J. Tyynela, and L. Laakso

This manuscript discusses the limitations of mesoscale weather models in detecting low altitude ducts in relation to their vertical and horizontal resolution. High and low resolution, in both vertical and horizontal directions (four total combinations), weather predictions are compared with observations made on a meteorological tower. Specifically, probability of detection and false alarm rate are examined and impact of the model resolution on these statistics is discussed. Findings show all resolutions examined were unable to detect near-surface ducts (<15 m), but ducts at higher altitudes (>30 m) were well predicted by all the model predictions.

The results presented in the manuscript are not particularly novel, as it is generally well known that mesoscale numerical weather models are not sufficient to resolve low altitude ducts, especially evaporation ducts, which is why they are often blended with surface layer models to resolve the lowest altitudes (as performed in some of the citations included in the paper). The paper does demonstrate these points using relatively unique data for direct evaluation of the numerical model predictions. For a topic area that has been studied extensively, the references are somewhat narrow. Also, more information about how the comparisons with the ground truth observations were performed is needed.

Below are some specific comments, but the manuscript is rated low mostly because of the lack of novelty and modeling advancement:

1. L41: Atmospheric stability influences the properties of an evaporation duct, but stable conditions are not solely needed for the formation of an evaporation duct. An evaporation duct (especially over the ocean) can form in unstable conditions as well as stable conditions. Furthermore, the first condition (high SST) is consistent with unstable conditions. Consider rephrasing.
2. L78: Eqn (1) is usually credited to Bean and Dutton 1966 – it is suggested to add this reference.
3. In general, the manuscript relies heavily on Turton et al., 1988 in section 3; but there are many more papers (as I’m sure the authors are aware) including the book by Bean and Dutton 1966 that discuss these points. In that sense, the manuscript should include more citations.
4. L80: It is important to denote that  $q$  (specific humidity) is in units of kg/kg (the reviewer assumes that is what was meant by “[unitless]”).
5. L85: “The best way to estimate signal propagation in the atmosphere is to use modified refractivity  $M...$ ” This statement needs to be rephrased – the best way to simulate signal propagation in the atmosphere is using a parabolic equation solution to Maxwell’s

equations. I think what the authors meant was: “The best way to model the atmosphere for simulating signal propagation uses modified refractivity,  $M$ ,....”

6. L86: “Modified refractivity takes into account the natural bending of the signal in the atmosphere due to curvature of the ground.” This should be rephrased – the signal doesn’t bend, the Earth does, e.g., “Modified refractivity takes into account the curvature of the Earth when determining whether refraction is bending signals towards the Earth or not.”
7. L101-106: There is a specific definition for duct strength – referred to as the  $M$ -deficit, which is the difference between  $M$  at the surface (or bottom of duct for an elevated duct) and  $M$  at the duct height. If this discussion is not referring to this definition of duct strength, then that should be clarified or reworded to avoid confusion. Furthermore, Table 1 is misleading because it suggests that refractivity ( $N$ ) and duct strength are related – it is vertical changes in  $N$  that dictate the duct strength. So, for example, a uniformly cold and humid environment does not mean a strong duct is present as Table 1 suggests.
8. L124-125: Duct formation, as the authors noted earlier in the manuscript, is very sensitive to sea surface temperature (SST), especially low altitude ducts. The use of a constant SST over a “whole forecast cycle” could cause issues with the identification of low altitude ducts. How long is the “whole forecast cycle”? This assumption of constant SST could influence forecast errors for ducting outside of upwelling situations, which should be discussed/mentioned.
9. L133-138: Was there any rationale behind the selection of the four different model resolutions tested? Please add a brief explanation.
10. L146-149: More information on how the “ground truth” or observations were used to compute refractivity gradients is needed as well as more specificity in how those are compared with the model outputs. For example, are  $M$ -gradients computed discretely between each pair of mast measurement levels and compared to  $M$ -gradients computed between the same pairs of model height levels? Are the observations averaged over the forecast period? If model levels and observation heights don’t align in terms of heights (which is presumably the case), is one interpolated or averaged? In other words, when comparing values at a specific height level (e.g., labeled as 2m, 30m, or 59m) are mast measurements averaged over an equivalent height range as a single model level represents, or is the closest model height to the observation levels compared (meaning more than one observation height could be compared with the same model level)? Additionally, for the observations, could a noisy measurement cause the appearance of a duct, or are the observations time averaged before the gradient is computed? Given the importance of the ground truth to the presented statistics, much more elaboration is needed on how this comparison is carried out.

11. L234-235: "...: the closer the source is to the duct, the higher the likelihood of signal trapping." This statement might be a bit misleading/unclear, if the signal is transmitted w/in the duct then it is more likely to be trapped depending on wavelength of the EM wave, but when outside the duct, then the closer the source is to the duct then the more likely it is to trap via leakage into the duct. Please clarify and rephrase.
12. L243-245: Ensemble forecasts of refractivity have been published and should be cited where discussed in the discussion section. (Zhao et al. 2016)
13. Figure 2: There is inconsistency in the use of  $dM/dh$  versus  $dM/dz$  throughout (this is one example). Suggest making the vertical coordinate a single variable either  $z$  or  $h$  but not both.
14. Figure 2: The gray dots are not where  $dM/dz < 0$  as denoted in the legend (which would be just negative values on the  $y$ -axis if they are labeled correctly). There are no units on any variable in this figure; are these normalized somehow, please explain or provide units.
15. Figure 7: It would be more helpful to see three lines on three subfigures rather than 9 subfigures.
16. Figures (generally): Should have labeled subpanels (i.e., a, b, c, etc.) and a description for each. All axis labels should include units unless the plotted quantity is unitless.
